# Supplementary material
Source: PubMed Central journal article supplement (PMC10469396)
Supplement: Supplementary_Data.pdf [file Supplementary_Data.pdf]

### Supplementary data

Promoter of the INS gene upstream and downstream of the TSS, according to the NCBI (human genome 11; INS, NCBI, ref seq NG\_007114.1), where 10 distinct CpG sites were studied. The analyzed CpG sites are shown in bold. They are numbered depending on the distance from the TSS. TSS has number +1. The underlined sequences represent the primer positions used in the PCR assay. TSS, transcription start site.

ggacaggggt ctggggacag cag**cg**caaag agcccc**cg**ccc tgcagcctcc agctctctg  
gtctaattg gaaagtggcc caggtgaggg ctttgctctc ctggagacat ttgccccag  
ctgtgagcag ggacaggtct ggccacc**cg**gg cccctgggta agactctaat gacc**cg**ctgg  
tcctgaggaa gaggtgctga **cg**accaagga gatctcecca cagaccagc accagggaaa  
tgg**tc**ggaa attgcagcct cagccccag ccatctg**cg** accccccac cccaggecct  
aatgggccag **cg**ggcagggg ttgagaggta ggggagatgg gctctgagac tataaagcca  
g**cg**ggggccc agcagccctc agcc**tc**cag gacaggctgc atcagaagag gccatcaagc  
aggtctgttc caaggccctt tg**ct**caggt gggctcagga ttccaggggtg
